# Supplementary material for: Polymeric ionic liquid nanogel-anchored tungstate anions: a robust catalytic system for oxidation of sulfides to sulfoxides
Source: Royal Society of Chemistry journal article supplement (doi:10.1039/c4nj01931h), 2014-12-02
Supplement: c4nj01931h1.pdf [file c4nj01931h1.pdf]

## Supporting Information

### **Polymeric Ionic Liquid Nanogel Anchored Tungstate Anions: A Robust Catalyst for Oxidation of Sulfides to Sulfoxides**

Ali Pourjavadi\*, Mojtaba Nazari-Chamazkoti, Seyed Hassan Hosseini

*Polymer Research Laboratory, Department of Chemistry, Sharif University of Technology, Tehran, Iran*

*E-mail address: purjavad@sharif.edu; Phone/fax: (982)166165311*

#### **Data for selected compounds:**

(Table 2, Entry 1) diphenyl sulfoxide:

$^1\text{H}$  NMR (400 MHz,  $\text{CDCl}_3$ )  $\delta$  (ppm): 7.46 (m, 3H), 7.64 (m, 2H).

FT-IR  $\nu(\text{S=O})$ : 1047  $\text{cm}^{-1}$ .

Ms (70 ev): m/e:  $\text{M}^+$ : 201

CHNS: calculated ( $\text{C}_{12}\text{H}_{10}\text{OS}$ ): C 71.0%, H 4.95%, S 15.84%. Found: C 71.41%, H 5.14 %, S 15.72%.

(Table 2, Entry 2) phenyl methyl sulfoxide:

$^1\text{H}$  NMR (400 MHz,  $\text{CDCl}_3$ )  $\delta$  (ppm): 2.69 (s, 3H), 7.50 (m, 3H), 7.60 (m, 2H).

FT-IR  $\nu(\text{S=O})$ : 1044  $\text{cm}^{-1}$ .

Ms (70 ev): m/e:  $\text{M}^+$ : 153

CHNS: calculated ( $\text{C}_7\text{H}_8\text{OS}$ ): C 60.0%, H 5.71%, S 22.85%. Found: C 60.13%, H 5.91 %, S 22.83%.

(Table 2, Entry 3) phenylethyl sulfoxide:

$^1\text{H}$  NMR (400 MHz,  $\text{CDCl}_3$ )  $\delta$  (ppm): 1.12 (t, 3H), 2.73 (m, 1H), 2.84 (m, 1H), 7.53 (m, 3H), 7.61 (d, 2H).

FT-IR  $\nu(\text{S}=\text{O})$ :  $1042\text{ cm}^{-1}$ .

Ms (70 eV): m/e:  $\text{M}^+$ : 153

CHNS: calculated ( $\text{C}_8\text{H}_{10}\text{OS}$ ): C 62.3%, H 6.49%, S 20.78%. Found: C 62.25%, H 6.63 %, S 20.70%.
